# Supplementary material for: Investigating the Potential Plasticizing Effect of Di-Carboxylic Acids for the Manufacturing of Solid Oral Forms with Copovidone and Ibuprofen by Selective Laser Sintering
Source: MDPI journal article supplement (doi:10.3390/polym13193282), 2021-09-26
Supplement: s1 [file s1]

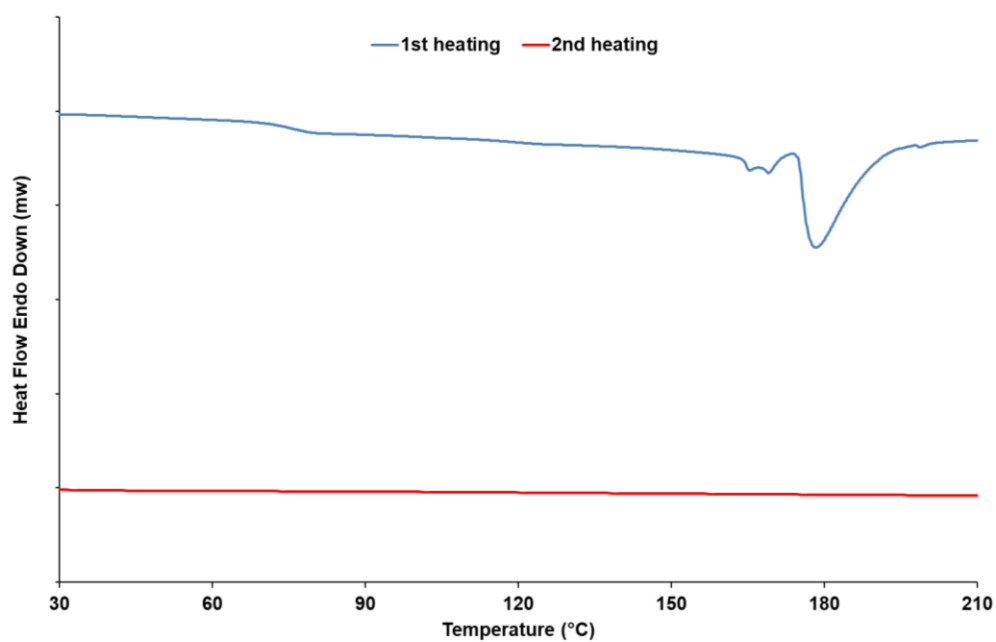

**Figure S1.** DSC thermograms of KVA64 during the 1<sup>st</sup> and 2<sup>nd</sup> heatings.

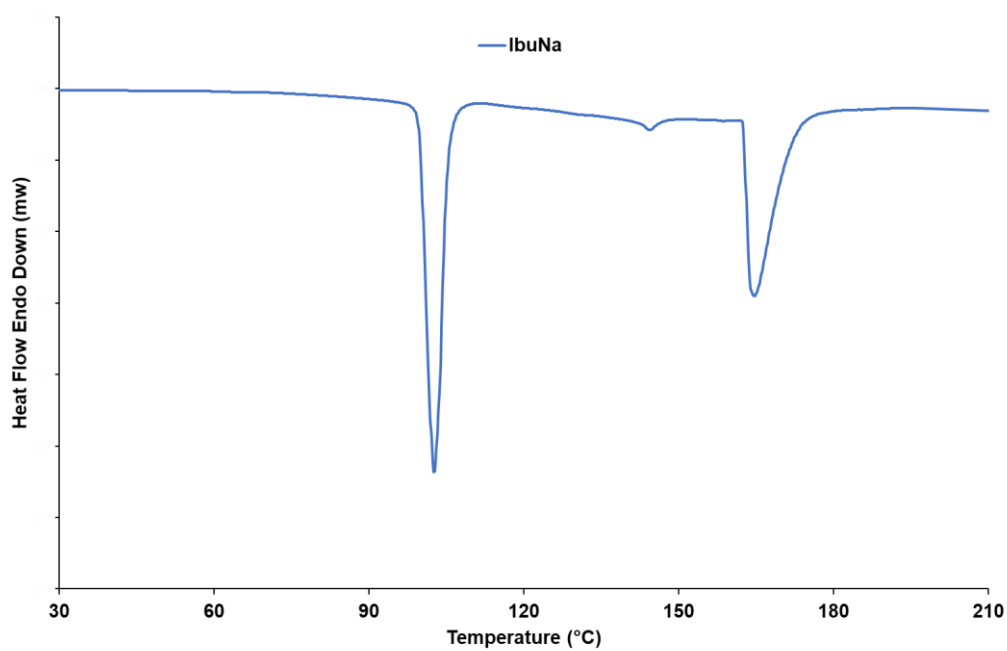

**Figure S2.** DSC thermogram of IbuNa.

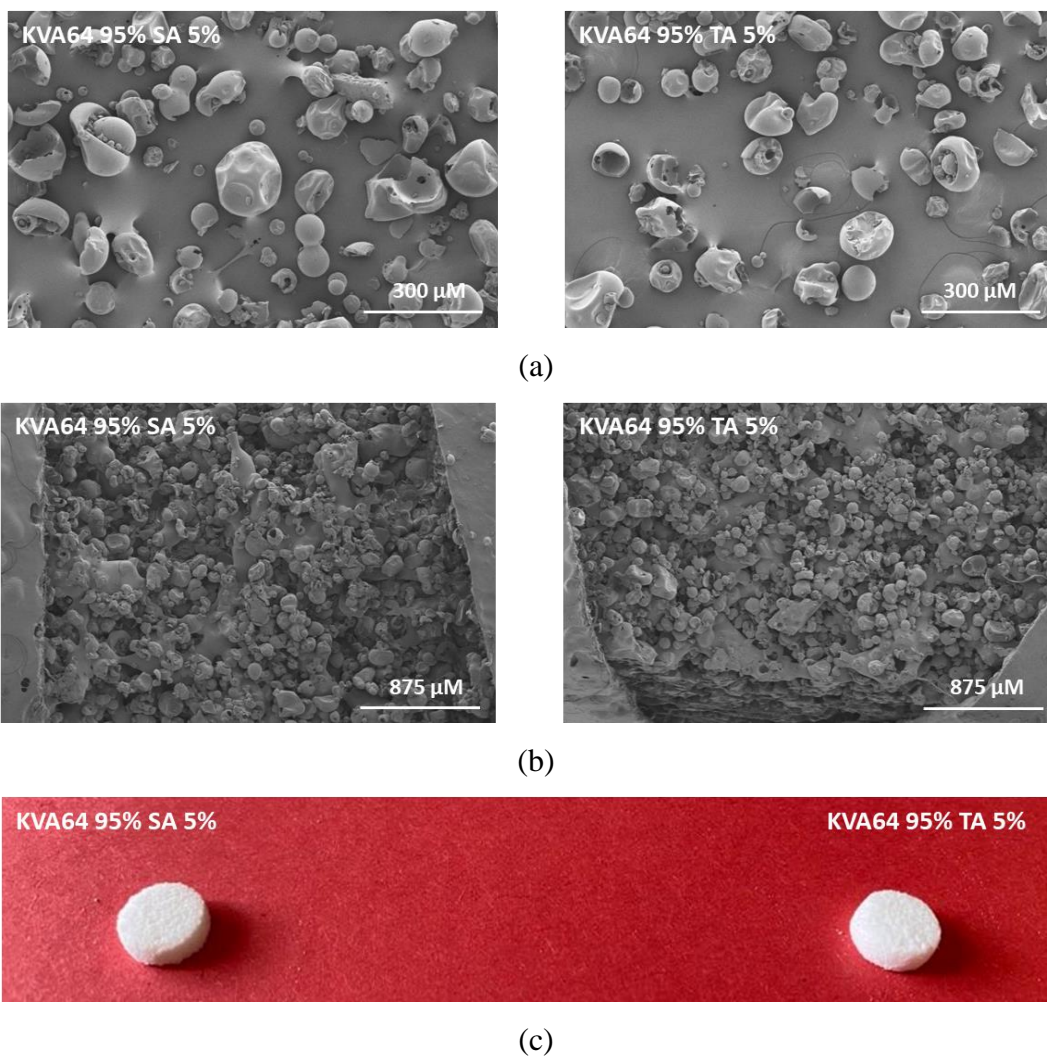

**Figure S3.** Images of the mixtures KVA64 95% / SA 5% and KVA64 95% / TA 5%: (a) SEM images of the powders (prior to sintering) (Magnification x 100), (b) SEM images of the SOFs vertical sections (Magnification x 35), images of the SOFs.

**Table S1.** Bulk density and true density of the different printed powders.

| Powders            | Bulk density (g/cm <sup>3</sup> ) | True density (g/cm <sup>3</sup> ) |
|--------------------|-----------------------------------|-----------------------------------|
| <b>KVA64</b>       | 0.38 ± 0.00                       | 1.23 ± 0.01                       |
| <b>KVA64/IbuAc</b> | 0.32 ± 0.00                       | 1.18 ± 0.02                       |
| <b>KVA64/IbuNa</b> | 0.37 ± 0.01                       | 1.19 ± 0.00                       |
| <b>KVA64/SA</b>    | 0.38 ± 0.00                       | 1.21 ± 0.00                       |
| <b>KVA64/FA</b>    | 0.37 ± 0.01                       | 1.21 ± 0.00                       |
| <b>KVA64/MA</b>    | 0.40 ± 0.00                       | 1.20 ± 0.01                       |
| <b>KVA64/MLA</b>   | 0.38 ± 0.01                       | 1.20 ± 0.00                       |
| <b>KVA64/TA</b>    | 0.40 ± 0.01                       | 1.20 ± 0.00                       |

|                         |                 |                 |
|-------------------------|-----------------|-----------------|
| <b>KVA64/SA10</b>       | $0.38 \pm 0.00$ | $1.21 \pm 0.01$ |
| <b>KVA64/SA15</b>       | $0.38 \pm 0.00$ | $1.22 \pm 0.02$ |
| <b>KVA64/SA20</b>       | $0.39 \pm 0.00$ | $1.25 \pm 0.00$ |
| <b>KVA64/IbuNa/SA</b>   | $0.37 \pm 0.00$ | $1.20 \pm 0.00$ |
| <b>KVA64/IbuNa/SA10</b> | $0.37 \pm 0.00$ | $1.20 \pm 0.02$ |
| <b>KVA64/IbuNa/SA15</b> | $0.38 \pm 0.00$ | $1.23 \pm 0.00$ |
| <b>KVA64/IbuNa/SA20</b> | $0.39 \pm 0.01$ | $1.25 \pm 0.00$ |
